# Supplementary material for: Polymer-Metal Adhesion of Single-Lap Joints Using Fused Filament Fabrication Process: Aluminium with Carbon Fiber Reinforced Polyamide
Source: MDPI journal article supplement (doi:10.3390/app13074429), 2023-03-30
Supplement: s1 [file s1]

# Mechanical Tests Raw Data for the Single-lap joints

The following graphs shows the “Shear Stress/Displacement” curves of the single-lap joints produced with ABS, PA and PA+CF, with the aluminium substrate abraded by SP and GB. For each experimental condition, three specimens were considered. The ULSS of the single-lap joints was calculated by averaging the maximum values of the shear stress of the three specimens. The E was estimated using a linear regression, in the linear region of the curves. The E of the single-lap joints was calculated by averaging the slope, obtained from the linear regression of the curves of the three specimens.

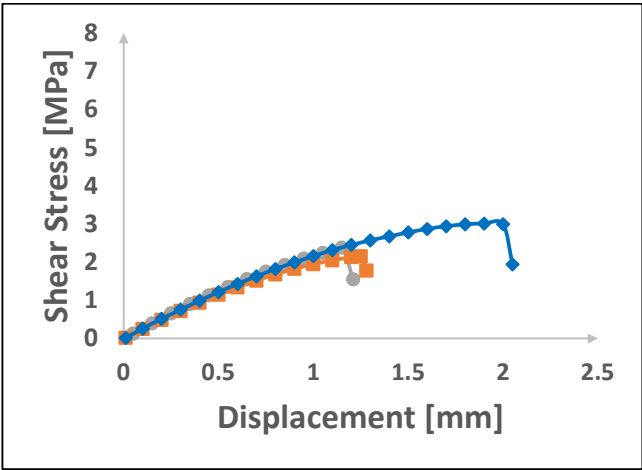

Figure S1. Aluminium-PA Joints with the aluminium substrate abraded by SP.

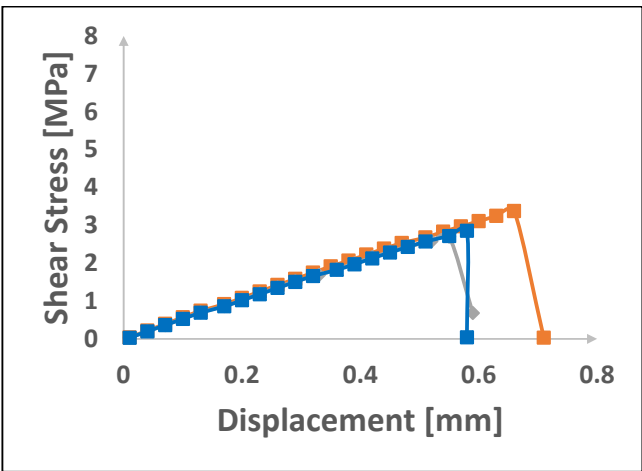

Figure S2. Aluminium-(PA+CF) Joints with the aluminium substrate abraded by SP.

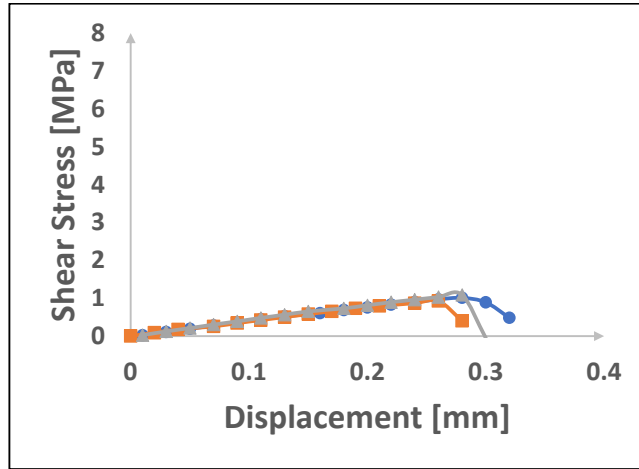

Figure S3. Aluminium-ABS Joints with the aluminium substrate abraded by GB.

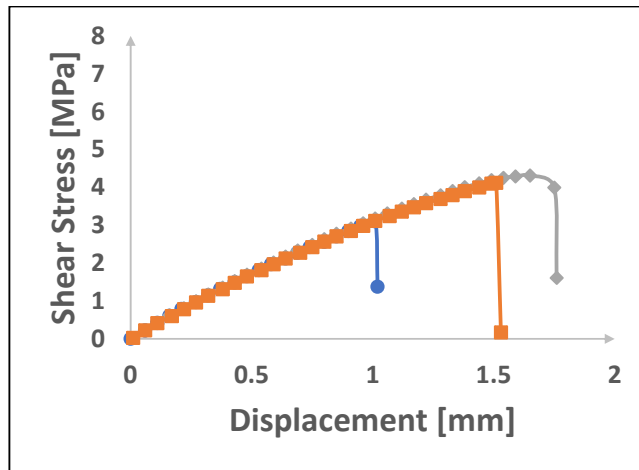

Figure S4. Aluminium-PA Joints with the aluminium substrate abraded by GB.

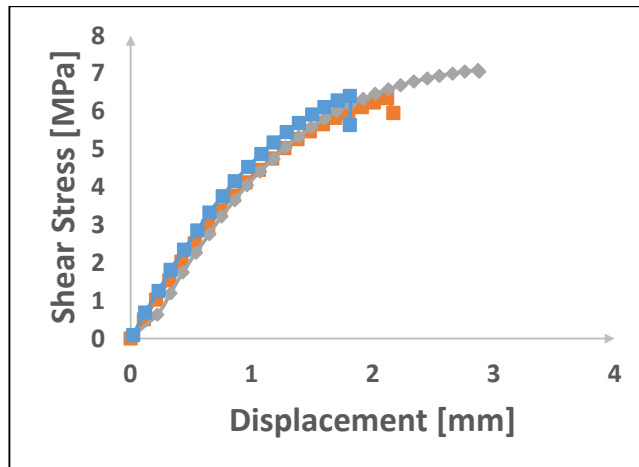

Figure S5. Aluminium-(PA+CF) Joints with the aluminium substrate abraded by GB.
